# Supplementary material
Source: ML conference proceedings conference paper supplement (https://aclanthology.org/D18-1366)
Supplement: Attachment [file D18-1366.Attachment.zip]

Archive with 1 entries (1 files):
- Appendix.pdf
